# Supplementary material for: Untangling product selectivity on clean low index rutile TiO2 surfaces using first-principles calculations
Source: Royal Society of Chemistry journal article supplement (doi:10.1039/d2cp04939b), 2022-12-20
Supplement: d2cp04939b1.pdf [file d2cp04939b1.pdf]

## **SUPPORTING INFORMATION**

### **Untangling product selectivity on clean low indexed rutile TiO<sub>2</sub> surfaces using first-principles calculations**

Anum Shahid Malik, Lisa A. Fredin\*

Department of Chemistry, Lehigh University, Bethlehem, PA 18015, USA.

[\\*lafredin@lehigh.edu](mailto:lafredin@lehigh.edu)

**This SI is divided into three parts.**

1. PCET mechanism/ Free energy profile calculation details.
2. Step-free free energies.
3. Optimized structures.

## SECTION I

We characterized the OER mechanism on four TiO<sub>2</sub> low-index Miller surfaces (110), (101), (010), and (001) slabs. We considered the 4-step proton-coupled electron-transfer mechanism and the intermediates OH\*, O\*, and OOH\*.<sup>1</sup> In what follows we use the O<sup>(d)</sup> and O<sup>(p)</sup> to represent the dangling and peroxo O\* intermediate i.e. 2<sup>nd</sup> step of oxygen evolution reaction. The most stable form of O\* intermediate species varies with the material.<sup>1,2</sup> The structures of the TiO<sub>2</sub> (110), (101), (010), and (001) surfaces are shown in Figure S1 and in Figures S2-S5.

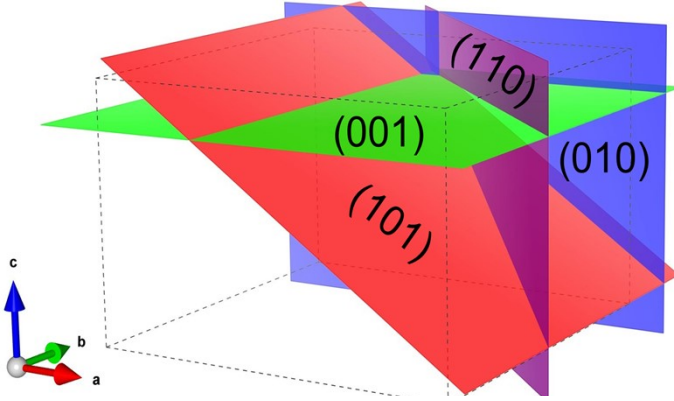

**Figure S1.** Rutile TiO<sub>2</sub> low-index Miller facets.

### 1. PCET mechanism

The four-step PCET mechanism starts with \* + H<sub>2</sub>O as the initial state of the catalysts.

The reaction steps are as follows:

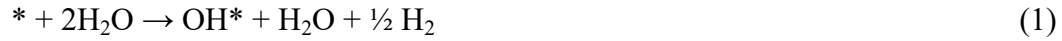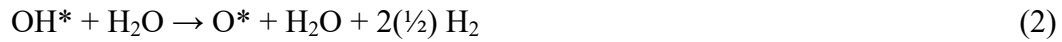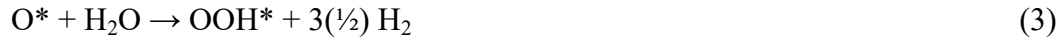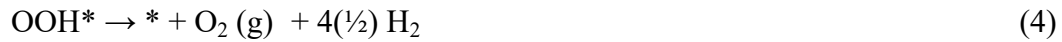

### 2. Free energy calculation scheme for oxygen evolution reaction (OER)

The details of the determination of Gibbs's free energy changes for Steps 1-4 are given below.

$$\Delta G_1 = \Delta G_{\text{OH}^*} - eU + \Delta G_{\text{H}^+} (\text{pH}) \quad (5)$$

$$\Delta G_2 = \Delta G_{\text{O}^*} - \Delta G_{\text{OH}^*} - eU + \Delta G_{\text{H}^+} (\text{pH}) \quad (6)$$

$$\Delta G_3 = \Delta G_{\text{OOH}^*} - \Delta G_{\text{O}^*} - eU + \Delta G_{\text{H}^+} (\text{pH}) \quad (7)$$

$$\Delta G_4 = 4.92 (\text{eV}) - \Delta G_{\text{OOH}^*} - eU + \Delta G_{\text{H}^+} (\text{pH}) \quad (8)$$

Where U is the potential measured against normal hydrogen electrode (NHE) at standard conditions (T = 298.15 K, P = 1 bar, pH = 0). The free energy change of the protons relative to the above-specified electrode at non-zero pH is represented by Nernst equation as  $\Delta G_{\text{H}^+} (\text{pH}) = -kT \ln(10) \times \text{pH}$ . The sum of  $\Delta G_{1-4}$  is fixed to the negative of experimental Gibbs free energy of formation of two water molecules  $-2\Delta$

$G_{OH_2} = 4 \times 1.23 = 4.92$  eV in order to avoid the calculation of the  $O_2$  bond energy, which is difficult to determine accurately within GGA-DFT. The Gibbs free energies of eqs 5-8 depend on the adsorption energies of  $OH^*$ ,  $O^*$ , and  $OOH^*$ . The Gibbs free energy differences of these intermediates include zero-point energy (ZPE) and entropy corrections accordingly,  $\Delta G_i = \Delta E + \Delta ZPE - T\Delta S_i$  and energy differences  $\Delta E_i$  considered relative to  $H_2O$  and  $H_2$  (at  $U = 0$  and  $pH = 0$ ) as

$$\Delta E_{OH^*} = E(OH^*) - E(*) - [E(H_2O) - \frac{1}{2}E(H_2)] \quad (9)$$

$$\Delta E_{O^*} = E(O^*) - E(*) - [E(H_2O) - E(H_2)] \quad (10)$$

$$\Delta E_{OOH^*} = E(OOH^*) - E(*) - [2E(H_2O) - 3\frac{1}{2}E(H_2)] \quad (11)$$

The theoretical Overpotential is defined as:

$$\eta = \max[\Delta G_1, \Delta G_2, \Delta G_3, \Delta G_4] / e - 1.23 \text{ [V]} \quad (12)$$

$\Delta G = \Delta E + \Delta ZPE - T\Delta S$  is calculated as follows:  $\Delta E$  is the reaction energy that we get from density functional theory (DFT).  $\Delta ZPE$  and  $\Delta S$  are the differences in zero-point energies, and the change in entropy respectively, which we get from references <sup>1,2</sup>.

**Table S1.** Differences in Zero-Point Energies,  $\Delta ZPE$ , and the Change in Entropy  $\Delta S$  for Intermediates.

| $(\Delta ZPE - T\Delta S)_{OH^*}$ | $(\Delta ZPE - T\Delta S)_{O^{(d)}/OOH^*}$ | $(\Delta ZPE - T\Delta S)_{O^{(p)}/OOH^*}$ |
|-----------------------------------|--------------------------------------------|--------------------------------------------|
| +0.40                             | - 0.30/+0.32                               | - 0.37/+0.39                               |

## SECTION II

### 1. Step Free energies of oxygen evolution reaction (OER) intermediates:

The standard hydrogen electrode potential at  $pH = 0$  is equal to  $\sim 1.23$  and  $\sim 0.40$  V at  $pH = 14$ .<sup>1</sup> Accordingly, the threshold values for  $1e^-$ ,  $2e^-$ , and  $4e^-$  processes are as given in (Table S2) referenced from.<sup>2</sup> We used Nernst's equation,<sup>3,4</sup> for the free energy correction at a given pH

$$\Delta G_{pH}(pH) = 2.30 \times pH \times k_B T \quad (13)$$

**Table S2:** Values of Standard Hydrogen Potential at  $pH = 0/14$

| pH           | 0                                  | 14   |
|--------------|------------------------------------|------|
| Product      | Standard Hydrogen Potential in (V) |      |
| $\bullet OH$ | 2.73                               | 1.90 |
| $H_2O_2$     | 1.76                               | 0.93 |
| $O_2$        | 1.23                               | 0.40 |

Based on these pH values we calculated the step-free and free energies relative to the resting state ' $* + 2H_2O$ ' at  $pH = 0$  the free energy data is provided in the main text in table 1 and step-free energies are shown in (Table S3) and at  $pH = 14$  shown in (Table S4 and S5) respectively.

**Table S3.** Step-free energies relative to the resting state ‘\* + 2H<sub>2</sub>O’ for ( $\Delta E^*$ ), ‘OH\*’ ( $\Delta E_{\text{OH}^*}$ ), O<sup>(d)</sup> ( $\Delta E_{\text{O}^{(d)}}$ ), O<sup>(p)</sup> ( $\Delta E_{\text{O}^{(p)}}$ ), OOH\* ( $\Delta E_{\text{OOH}^*}$ ), and O<sub>2</sub> ( $\Delta E_{\text{O}_2}$ ) and overpotentials ‘ $\eta$ ’ through four-, two- and one-electron (O<sub>2</sub>/H<sub>2</sub>O<sub>2</sub>/•OH evolution) processes for all systems. The bold characters marked are rate-limiting steps.

| Mechanism          | $\Delta E_{\text{OH}^*}$ | $\Delta E_{\text{O}^{(d)}}$ | $\Delta E_{\text{O}^{(p)}}$ | $\Delta E_{\text{OOH}^*}$ | $\Delta E_{\text{O}_2}$ |
|--------------------|--------------------------|-----------------------------|-----------------------------|---------------------------|-------------------------|
| 001 <sup>(d)</sup> | <b>2.59</b>              | 2.50                        | –                           | 0.51                      | –0.26                   |
| 001 <sup>(p)</sup> | <b>2.59</b>              | –                           | 2.10                        | 0.91                      | –0.26                   |
| 101 <sup>(d)</sup> | 1.73                     | <b>2.83</b>                 | –                           | 0.49                      | –0.13                   |
| 101 <sup>(p)</sup> | <b>1.73</b>              | –                           | 2.25                        | 1.07                      | –0.13                   |
| 110 <sup>(d)</sup> | 1.59                     | <b>2.86</b>                 | –                           | –0.39                     | 0.86                    |
| 110 <sup>(p)</sup> | <b>1.59</b>              | –                           | 2.02                        | 0.45                      | 0.86                    |
| 010 <sup>(d)</sup> | 0.64                     | <b>2.66</b>                 | –                           | –0.56                     | 2.18                    |
| 010 <sup>(p)</sup> | 0.64                     | –                           | 1.09                        | 1.01                      | <b>2.18</b>             |

**Table S4.** Step-free energies at pH=14 relative to the resting state ‘\* + 2H<sub>2</sub>O’

| Mechanism<br>pH (14) | $\Delta E_{\text{OH}^*}$ | $\Delta E_{\text{O}^{(d)}}$ | $\Delta E_{\text{O}^{(p)}}$ | $\Delta E_{\text{OOH}^*}$ | $\Delta E_{\text{O}_2}$ |
|----------------------|--------------------------|-----------------------------|-----------------------------|---------------------------|-------------------------|
| 001 <sup>(d)</sup>   | <b>1.76</b>              | 1.67                        | –                           | –0.32                     | –1.09                   |
| 001 <sup>(p)</sup>   | <b>1.76</b>              | –                           | 1.27                        | 0.08                      | –1.09                   |
| 101 <sup>(d)</sup>   | 0.90                     | <b>2.00</b>                 | –                           | –0.34                     | –0.96                   |
| 101 <sup>(p)</sup>   | 0.90                     | –                           | 2.35                        | –0.34                     | –0.96                   |
| 110 <sup>(d)</sup>   | 0.76                     | <b>2.03</b>                 | –                           | –1.22                     | 0.03                    |
| 110 <sup>(p)</sup>   | <b>0.76</b>              | –                           | 1.19                        | –0.38                     | 0.03                    |
| 010 <sup>(d)</sup>   | –0.19                    | <b>1.83</b>                 | –                           | –1.39                     | 1.35                    |
| 010 <sup>(p)</sup>   | –0.19                    | –                           | 0.26                        | 0.18                      | <b>1.35</b>             |

**Table S5:** Free energies relative to the resting state ‘\* + 2H<sub>2</sub>O’ at pH= 14.

| Mechanism<br>pH (14) | $\Delta G_{\text{OH}^*}$ | $\Delta G_{\text{O}^{(d)}}$ | $\Delta G_{\text{O}^{(p)}}$ | $\Delta G_{\text{OOH}^*}$ | $\Delta G_{\text{O}_2}$ | Product                       | R.D.S          | $\eta$ (V)<br>1e <sup>–</sup> | $\eta$ (V)<br>2e <sup>–</sup> | $\eta$ (V)<br>4e <sup>–</sup> |
|----------------------|--------------------------|-----------------------------|-----------------------------|---------------------------|-------------------------|-------------------------------|----------------|-------------------------------|-------------------------------|-------------------------------|
| 001 <sup>(d)</sup>   | <b>2.16</b>              | 3.53                        | –                           | 3.53                      | 1.60                    | •OH                           | OH*            | 1.76                          | –                             | –                             |
| 001 <sup>(p)</sup>   | <b>2.16</b>              | –                           | 3.06                        | 3.53                      | 1.60                    | •OH <sup>–</sup>              | OH*            | 1.76                          | –                             | –                             |
| 101 <sup>(d)</sup>   | 1.30                     | <b>3.00</b>                 | –                           | 2.98                      | 1.60                    | H <sub>2</sub> O <sub>2</sub> | O*             | –                             | 0.77                          | 1.30                          |
| 101 <sup>(p)</sup>   | <b>1.30</b>              | –                           | 2.35                        | 2.98                      | 1.60                    | H <sub>2</sub> O <sub>2</sub> | OH*            | –                             | 0.37                          | 0.90                          |
| 110 <sup>(d)</sup>   | 1.16                     | <b>2.89</b>                 | –                           | 1.99                      | 1.60                    | H <sub>2</sub> O <sub>2</sub> | O*             | –                             | 0.80                          | 1.33                          |
| 110 <sup>(p)</sup>   | <b>1.16</b>              | –                           | 1.98                        | 1.99                      | 1.60                    | H <sub>2</sub> O <sub>2</sub> | OH*            | –                             | 0.23                          | 0.76                          |
| 010 <sup>(d)</sup>   | 0.21                     | <b>1.74</b>                 | –                           | 0.67                      | 1.60                    | O <sub>2</sub>                | O*             | –                             | –                             | 1.13                          |
| 010 <sup>(p)</sup>   | 0.21                     | –                           | 0.10                        | 0.67                      | <b>1.60</b>             | O <sub>2</sub>                | O <sub>2</sub> | –                             | –                             | 0.53                          |

## SECTION III

### 1. DoS Calculations for all the surfaces.

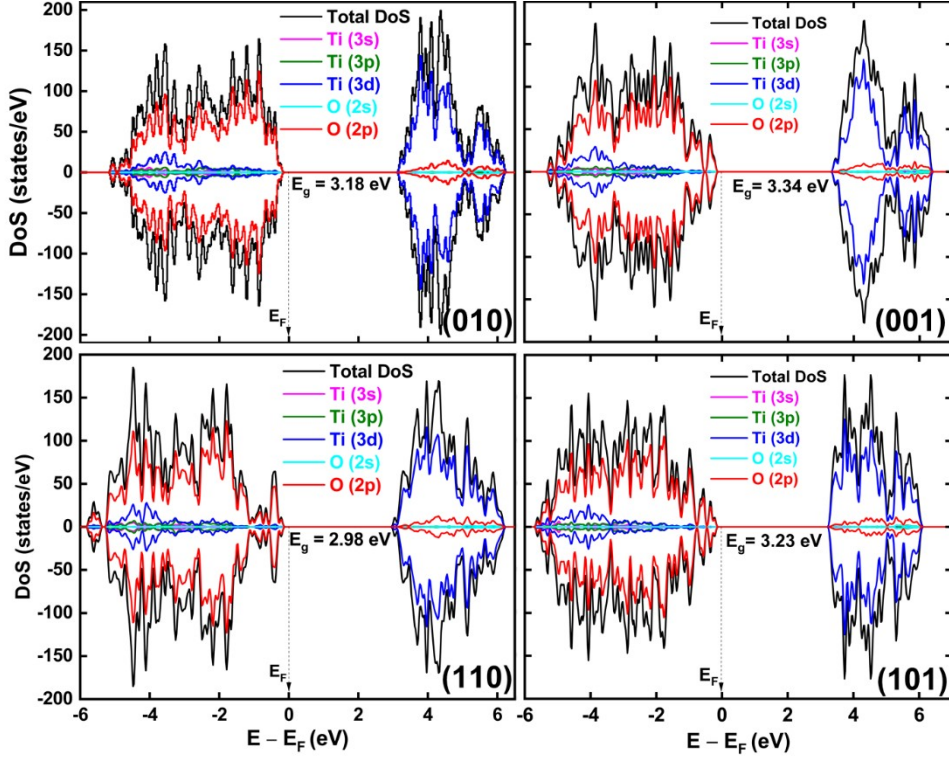

**Figure S6.** Plotted DoS for TiO<sub>2</sub> (010), (001), (110) and (101) surface.  $E_g$  represents the band gap value whereas Fermi energy level  $E_F$  lies at 0 eV.

**Table S6:** Bader charges of the OH\*, dangling O<sup>(d)</sup>, peroxo O<sup>(p)</sup>, and OOH\* intermediates. BC(OH\*), BC(O<sup>(d)</sup>), BC(O<sup>(p)</sup>), and BC(OOH\*) are the Bader charges (BC) of the OER intermediates; O<sup>s</sup> is the charge on surface oxygen where O<sup>(p)</sup> denotes adsorbed peroxo specie. Note that the O 1s core electrons are not included in the electron count as they are treated with pseudopotentials.

| Intermediates<br>/ Surfaces | BC (OH*) |      |      | BC (O <sup>(d)</sup> ) |                  | BC (O <sup>(p)</sup> ) |                |                  | BC (OOH*) |      |      |      |
|-----------------------------|----------|------|------|------------------------|------------------|------------------------|----------------|------------------|-----------|------|------|------|
|                             | Ti       | O    | H    | Ti                     | O <sup>(d)</sup> | Ti                     | O <sup>s</sup> | O <sup>(p)</sup> | Ti        | O    | O    | H    |
| 001                         | 7.84     | 7.12 | 0.36 | 7.87                   | 6.57             | 7.91                   | 6.62           | 6.44             | 7.87      | 6.40 | 6.55 | 0.33 |
| 101                         | 7.84     | 7.08 | 0.34 | 7.84                   | 6.55             | 7.86                   | 6.53           | 6.62             | 7.85      | 6.22 | 6.39 | 0.33 |
| 110                         | 7.82     | 7.08 | 0.33 | 7.84                   | 6.53             | 7.87                   | 6.67           | 6.43             | 7.81      | 6.22 | 6.41 | 0.38 |
| 010                         | 7.85     | 7.09 | 0.35 | 7.85                   | 6.82             | 7.87                   | 6.59           | 6.46             | 7.84      | 6.48 | 6.66 | 0.35 |

**Table S7:** Bond lengths of all optimized intermediates OH\*, dangling O<sup>(d)</sup>, peroxo O<sup>(p)</sup>, and OOH\* given in (Å).

| Intermediates<br>/ Surfaces | OH*   |       | O <sup>(d)</sup>    |                     | O <sup>(p)</sup>                 |       | OOH*  |       |  |
|-----------------------------|-------|-------|---------------------|---------------------|----------------------------------|-------|-------|-------|--|
|                             | Ti-O  | O-H   | Ti-O <sup>(d)</sup> | Ti-O <sup>(p)</sup> | O <sup>(p)</sup> -O <sup>s</sup> | Ti-O  | O-O   | O-H   |  |
| 001                         | 1.847 | 0.973 | 1.835               | 1.917               | 1.425                            | 2.039 | 1.406 | 0.984 |  |
| 101                         | 1.800 | 0.993 | 1.646               | 1.911               | 1.451                            | 1.923 | 1.461 | 0.982 |  |
| 110                         | 1.790 | 0.976 | 1.654               | 1.905               | 1.467                            | 2.264 | 1.353 | 0.989 |  |
| 010                         | 1.785 | 0.987 | 2.095               | 2.073               | 1.462                            | 2.188 | 1.327 | 0.977 |  |

## 2. Formation energies of oxygen evolution reaction (OER) intermediates:

We calculated the formation energies (Table S8) of all the studied systems and their intermediates. The formation of each unit cell structure from the constituent standard states of Ti, O<sub>2</sub>, and H<sub>2</sub> were used. So that for each bare surface the formation energy is:

$$\Delta E_F^{(TiO_2)_n} = E_{(TiO_2)_n} - nE_{Ti} - \frac{n}{2}E_{O_2} \quad (14)$$

Where,  $E_{TiO_2}$  is the DFT total energy of the system TiO<sub>2</sub>,  $E_{Ti}$  and  $E_{O_2}$  are DFT energies of metallic Ti and O<sub>2</sub> molecule.

**Table S8:** Formation energies of all the surfaces ( $\Delta E_F^*$ ) and intermediates OH\* ( $\Delta E_{OH}^{OH*}$ ), dangling O<sup>(d)</sup> ( $\Delta E_{OH}^{O(d)}$ ), peroxo O<sup>(p)</sup> ( $\Delta E_{OH}^{O(p)}$ ), and OOH\* ( $\Delta E_{OH}^{OOH*}$ ) given in eV/atom.

| Intermediates / Surfaces | $\Delta E_F^*$<br>eV/atom | $\Delta E_{OH}^{OH*}$<br>eV/atom | $\Delta E_{OH}^{O(d)}$<br>eV/atom | $\Delta E_{OH}^{O(p)}$<br>eV/atom | $\Delta E_{OH}^{OOH*}$<br>eV/atom |
|--------------------------|---------------------------|----------------------------------|-----------------------------------|-----------------------------------|-----------------------------------|
| <b>001</b>               | -2.16                     | -2.14                            | -2.13                             | -2.13                             | -2.11                             |
| <b>101</b>               | -2.16                     | -2.14                            | -2.13                             | -2.14                             | -2.12                             |
| <b>110</b>               | -2.24                     | -2.21                            | -2.21                             | -2.21                             | -2.20                             |
| <b>010</b>               | -2.24                     | -2.22                            | -2.21                             | -2.22                             | -2.20                             |

### References:

- (1) Valdés, Á.; Qu, Z.-W.; Kroes, G.-J.; Rossmeisl, J.; Nørskov, J. K. Oxidation and Photo-Oxidation of Water on TiO<sub>2</sub> Surface. *The Journal of Physical Chemistry C* **2008**, *112* (26), 9872–9879. <https://doi.org/10.1021/jp711929d>.
- (2) Malik, A. S.; Liu, T.; Dupuis, M.; Li, R.; Li, C. Water Oxidation on TiO<sub>2</sub>: A Comparative DFT Study of 1e<sup>-</sup>, 2e<sup>-</sup>, and 4e<sup>-</sup> Processes on Rutile, Anatase, and Brookite. *The Journal of Physical Chemistry C* **2020**, *124* (15), 8094–8100. <https://doi.org/10.1021/acs.jpcc.9b11450>.
- (3) Feiner, A.-S.; McEvoy, A. J. The Nernst Equation. *J Chem Educ* **1994**, *71* (6), 493.
- (4) Walczak, M. M.; Dryer, D. A.; Jacobson, D. D.; Foss, M. G.; Flynn, N. T. PH Dependent Redox Couple: An Illustration of the Nernst Equation. *J Chem Educ* **1997**, *74* (10), 1195.
